# Supplementary material for: Perceived antidepressant efficacy associated with reduced negative and enhanced neutral mnemonic discrimination
Source: PubMed Central journal article supplement (PMC10494429; doi:10.3389/fnhum.2023.1225836), 2023-08-28
Supplement: Image_1.pdf [file Image_1.pdf]

## Supplementary Material

### Perceived antidepressant efficacy associated with reduced negative and enhanced neutral mnemonic discrimination

Taylor O. Phillips\*\*, Madelyn Castro\*\*, Rishi K. Vas, Lorena A. Ferguson, Amritha Harikumar, & Stephanie L. Leal\*

\*Correspondence: Stephanie L. Leal, Ph.D.: [stephanieleal@rice.edu](mailto:stephanieleal@rice.edu)

#### 1 Supplementary Figures and Tables

##### 1.1 Supplementary Figures

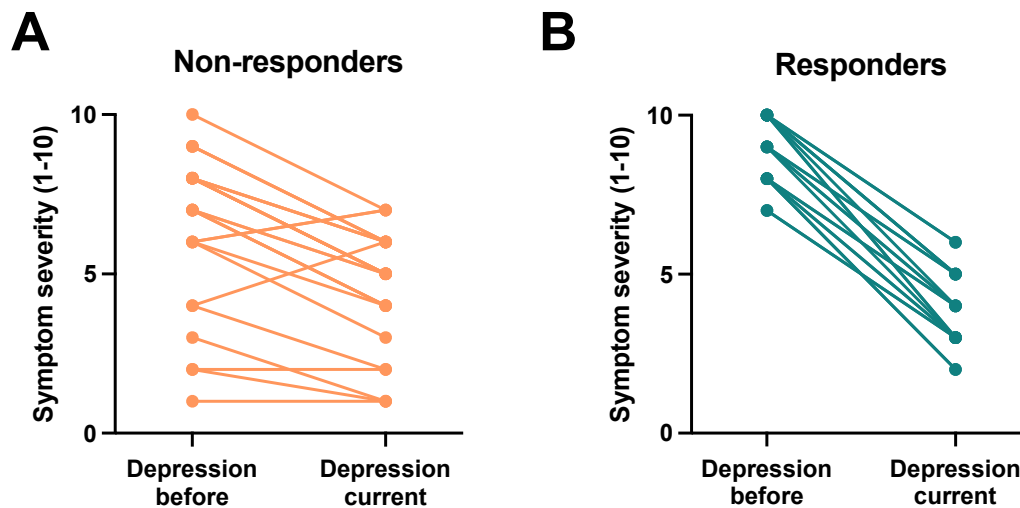

**Supplementary Figure 1. Responders versus non-responder differences in depressive symptom severity.** A) Non-responders depressive symptom severity before (retrospectively) versus current, B) Responders depressive symptom severity before (retrospectively) versus current.
